# Supplementary material
Source: Springer Nature journal article supplement (https://www.springermedizin.de/resource/supplementary/12889_2010_2198_MOESM1_ESM.pdf/9484934)
Supplement: MOESM1 [file 9484934]

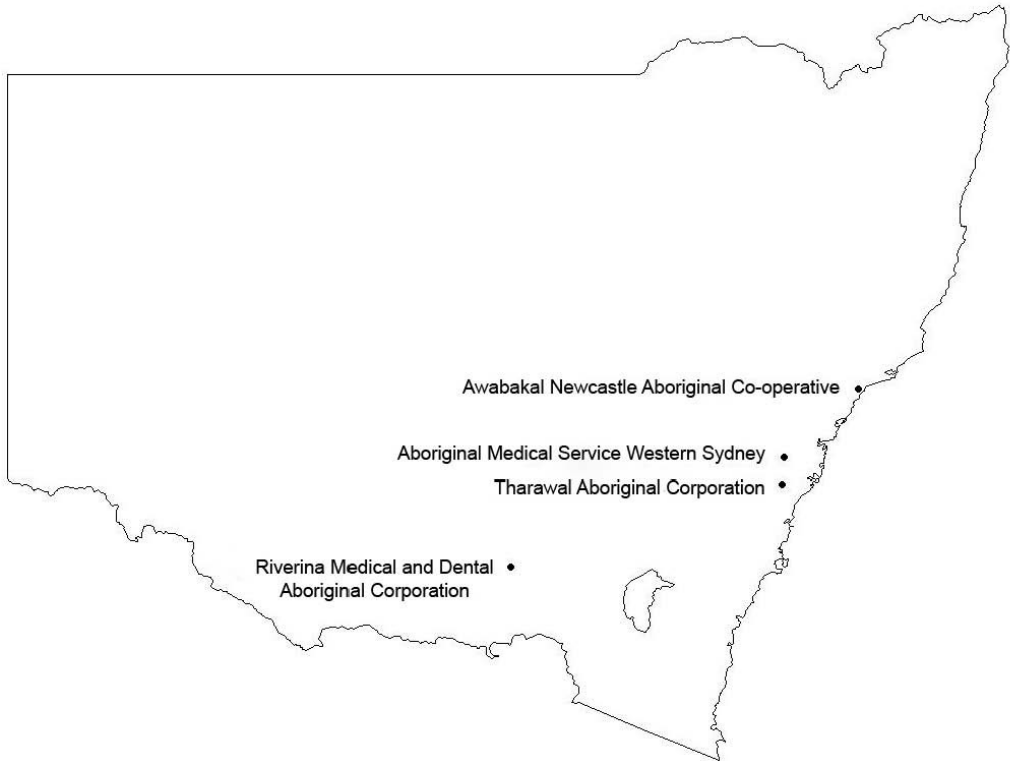

Awabakal Newcastle Aboriginal Co-operative •

Aboriginal Medical Service Western Sydney •

Tharawal Aboriginal Corporation •

Riverina Medical and Dental •  
Aboriginal Corporation
